# Supplementary material for: The Endemic Vascular Flora of Sardinia: a Dynamic Checklist with an Overview of Biogeography and Conservation Status
Source: Preprints.org preprint supplement (doi:10.20944/preprints202202.0072.v1), 2022-02-04
Supplement: Supplementary file 1 [file supplementary]

## Sheet: Taxa includenda and inquirenda
Table S1. List of taxa includenda (•) and inquirenda (*) with the following information: 1, Dominant biological form; 2, Distribution; 3, Chorological category; 4, Biogegraphical unit; 5, Global IUCN assessment; and their 6 sources (see sheet 3 for full references). See the main manuscript for Distribution and Chorological categories details.
	Taxon	Family	1	2	3	4	5	6
·	Acis rosea (F.Martin bis) Sweet	Amaryllidaceae	G	SA-CO	ESC	Sa-Co prov.	LC	1.2
·	Allium parciflorum Viv.	Amaryllidaceae	G	SA-CO	ESC	Sa-Co prov.	NE
·	Anarrhinum corsicum Jord. & Fourr.	Plantaginaceae	H	SA-CO	ESC	Sa-Co prov.	NE
·	Anchusa capellii Moris	Boraginaceae	H	SA	ESA	Sa subprov.	NT	3
·	Anchusa crispa Viv. subsp. crispa	Boraginaceae	H	SA-CO	ESC	Sa-Co prov.	EN	1, 4
·	Anchusa crispa Viv. subsp. maritima (Vals.) Selvi & Bigazzi	Boraginaceae	H	SA	ESA	Sa subprov.	EN	3
·	Anchusa formosa Selvi, Bigazzi & Bacch.	Boraginaceae	H	SA	ESA	Sa subprov.	LC	5
·	Anchusa litorea Moris	Boraginaceae	T	SA	ESA	Sa subprov.	CR	3
·	Anchusa montelinasana Angius, Pontec. & Selvi	Boraginaceae	H	SA	ESA	Sa subprov.	NT	3
·	Anchusa sardoa (Illario) Selvi & Bigazzi	Boraginaceae	H	SA	ESA	Sa subprov.	CR	3
·	Anthyllis hermanniae L. subsp. ichnusae Brullo & Giusso	Fabaceae	NP	SA	ESA	Sa subprov.	LC	3
·	Aquilegia barbaricina Arrigoni & E.Nardi	Ranunculaceae	G	SA	ESA	Sa subprov.	CR	3
·	Aquilegia cremnophila Bacch., Brullo, Congiu, Fenu, J.L.Garrido & Mattana	Ranunculaceae	G	SA	ESA	Sa subprov.	CR	3
·	Aquilegia nugorensis Arrigoni & E.Nardi	Ranunculaceae	G	SA	ESA	Sa subprov.	EN	3
·	Aquilegia nuragica Arrigoni & E.Nardi	Ranunculaceae	G	SA	ESA	Sa subprov.	CR	3
·	Arenaria balearica L.	Caryophyllaceae	H	SA-CO-AT-BL	EMOI	W-Medit. subreg.	NE
·	Aristolochia navicularis E.Nardi	Aristolochiaceae	G	SA-SI-AG-TN	ETI-NA	W-Medit. subreg.	NE
*	Aristolochia rotunda L. subsp. insularis (E.Nardi & Arrigoni) Gamisans	Aristolochiaceae	G	SA-CO-AT	ETI	Ital.-Tyrr. superprov.	NE
·	Aristolochia tyrrhena E.Nardi & Arrigoni	Aristolochiaceae	G	SA-CO-(AT)	ESC	Sa-Co prov.	NE
·	Armeria morisii Boiss.	Plumbaginaceae	H	SA	ESA	Sa subprov.	LC	3
·	Armeria sardoa Spreng. subsp. genargentea Arrigoni	Plumbaginaceae	H	SA	ESA	Sa subprov.	NT	3
·	Armeria sardoa Spreng. subsp. sardoa	Plumbaginaceae	H	SA	ESA	Sa subprov.	NT	3
·	Armeria sulcitana Arrigoni	Plumbaginaceae	H	SA	ESA	Sa subprov.	LC	3
·	Artemisia caerulescens L. subsp. densiflora (Viv.) Kerguélen & Lambinon	Asteraceae	H	SA-CO	ESC	Sa-Co prov.	NE
·	Arum pictum L.f. subsp. pictum	Araceae	G	SA-CO-AT	ETI	Ital.-Tyrr. superprov.	LC	1.6
·	Astragalus genargenteus Moris	Fabaceae	Ch	SA	ESA	Sa subprov.	LC	3
·	Astragalus gennarii Bacch. & Brullo	Fabaceae	Ch	SA	ESA	Sa subprov.	CR	3
·	Astragalus maritimus Moris	Fabaceae	H	SA	ESA	Sa subprov.	CR	3
·	Astragalus tegulensis Bacch. & Brullo	Fabaceae	Ch	SA	ESA	Sa subprov.	CR	3
·	Astragalus terraccianoi Vals.	Fabaceae	Ch	SA-CO	ESC	Sa-Co prov.	NE
·	Astragalus thermensis Vals.	Fabaceae	Ch	SA-(SI)	ESA	Sa subprov.	EN	3
·	Astragalus verrucosus Moris	Fabaceae	H	SA	ESA	Sa subprov.	CR	3
·	Barbarea rupicola Moris	Brassicaceae	H	SA-CO	ESC	Sa-Co prov.	NE
·	Bellium bellidioides L.	Asteraceae	H	SA-CO-BL	EMOI	W-Medit. subreg.	NE
·	Bellium crassifolium Moris	Asteraceae	Ch	SA	ESA	Sa subprov.	EN	3
*	Biscutella morisiana Raffaelli	Brassicaceae	T	SA-(CO)	ESA	Sa subprov.	LC	3
·	Bituminaria morisiana (Pignatti & Metlesics) Greuter	Fabaceae	Ch	SA-TN (La Galite)	ETI-NA	W-Medit. subreg.	NE
·	Bivonaea lutea (Biv.) DC.	Brassicaceae	T	SA-SI-TN-AG	ETI-NA	W-Medit. subreg.	NE
·	Borago morisiana Bigazzi & Ricceri	Boraginaceae	H	SA	ESA	Sa subprov.	EN	3
·	Borago pygmaea (DC.) Chater & Greuter	Boraginaceae	H	SA-CO-AT	ETI	Ital.-Tyrr. superprov.	NE
·	Brassica insularis Moris	Brassicaceae	NP	SA-CO-SI (Pantelleria)-TN	ETI-NA	W-Medit. subreg.	NT	1.7
·	Brassica tyrrhena Giotta, Piccitto & Arrigoni	Brassicaceae	Ch	SA	ESA	Sa subprov.	LC	3
·	Brimeura fastigiata (Viv.) Chouard	Asparagaceae	G	SA-CO-BL	EMOI	W-Medit. subreg.	NE
·	Bryonia marmorata E.Petit	Cucurbitaceae	G	SA-CO	ESC	Sa-Co prov.	NE
·	Buglossoides minima (Moris) R.Fern.	Boraginaceae	T	SA-SI-ITM (Calabria)	ET	Ital.-Tyrr. superprov.	NT	3
·	Bunium corydalinum DC.	Apiaceae	G	SA-CO	ESC	Sa-Co prov.	NE
·	Buphthalmum inuloides Moris	Asteraceae	Ch	SA	ESA	Sa subprov.	LC	3
·	Campanula forsythii (Arcang.) Bég.	Campanulaceae	H	SA	ESA	Sa subprov.	LC	3
·	Carduus cephalanthus Viv.	Asteraceae	H	SA-CO-SI-AG-AT	ETI-NA	W-Medit. subreg.	NE
·	Carduus fasciculiflorus Viv.	Asteraceae	H	SA-CO-AT	ETI	Ital.-Tyrr. superprov.	NE
·	Carduus sardous DC.	Asteraceae	H	SA-CO-AT-(ITC)	ETI	Ital.-Tyrr. superprov.	NE
*	Carex caryophyllea Latourr. subsp. insularis (Christ ex Barbey) Arrigoni	Cyperaceae	H	SA-CO	ESC	Sa-Co prov.	NE
·	Carex microcarpa Bertol. ex Moris	Cyperaceae	G	SA-CO-AT	ETI	Ital.-Tyrr. superprov.	LC	1.8
·	Carex panormitana Guss.	Cyperaceae	G	SA-SI-TN	ETI-NA	W-Medit. subreg.	LC	1.9
·	Carlina macrocephala Moris	Asteraceae	H	SA-CO	ESC	Sa-Co prov.	NE
·	Castroviejoa montelinasana (Em.Schmid) Galbany, L.Sáez & Benedí	Asteraceae	Ch	SA	ESA	Sa subprov.	LC	3
*	Centaurea corensis Vals. & Filigh.	Asteraceae	H	SA	ESA	Sa subprov.	CR	3
·	Centaurea filiformis Viv. subsp. ferulacea (Martelli) Arrigoni	Asteraceae	Ch	SA	ESA	Sa subprov.	EN	3
·	Centaurea filiformis Viv. subsp. filiformis	Asteraceae	Ch	SA	ESA	Sa subprov.	EN	3
·	Centaurea horrida Badarò	Asteraceae	Ch	SA	ESA	Sa subprov.	EN	3
·	Centaurea magistrorum Arrigoni & Camarda	Asteraceae	H	SA	ESA	Sa subprov.	CR	3
·	Centranthus amazonum Fridl. & A.Raynal	Caprifoliaceae	Ch	SA	ESA	Sa subprov.	CR	3
·	Cephalaria bigazzii Bacch., Brullo & Giusso	Dipsacaceae	Ch	SA	ESA	Sa subprov.	CR	3
·	Cephalaria mediterranea (Viv.) Szabó	Dipsacaceae	Ch	SA	ESA	Sa subprov.	LC	3
·	Cerastium palustre Moris	Caryophyllaceae	T	SA-CO	ESC	Sa-Co prov.	NE
·	Cerastium supramontanum Arrigoni	Caryophyllaceae	H	SA	ESA	Sa subprov.	NT	3
·	Charybdis glaucophylla Bacch., Brullo, D'Emerico, Pontec. & Salmeri	Asparagaceae	G	SA-CO-TN	ETI-NA	W-Medit. subreg.	LC	10
*	Cistus creticus L. subsp. corsicus (Loisel.) Greuter & Burdet	Cistaceae	NP	SA-CO	ESC	Sa-Co prov.	NE
·	Clinopodium sandalioticum (Bacch. & Brullo) Bacch. & Brullo ex Peruzzi & F.Conti	Lamiaceae	Ch	SA	ESA	Sa subprov.	CR	3
*	Colchicum corsicum Baker	Colchicaceae	G	SA-CO	ESC	Sa-Co prov.	VU	11
·	Colchicum gonarei Camarda	Colchicaceae	G	SA	ESA	Sa subprov.	LC	3
·	Colchicum nanum K.Perss.	Colchicaceae	G	SA-CO	ESC	Sa-Co prov.	LC	1.12
·	Colchicum verlaqueae Fridl.	Colchicaceae	G	SA	ESA	Sa subprov.	DD	3
·	Crepis hyemalis (Biv.) Ces., Pass. & Gibelli	Asteraceae	T	SA-SI	ESS	Ital.-Tyrr. superprov.	NT	3
·	Crocus minimus DC.	Iridaceae	G	SA-CO-AT	ETI	Ital.-Tyrr. superprov.	NE
·	Cuscuta epithymum (L.) L. subsp. corsicana (Yunk.) Lambinon	Convolvulaceae	T	SA-CO	ESC	Sa-Co prov.	NE
·	Cyclamen balearicum Willk.	Primulaceae	G	SA-CO-BL-GA	EMO	W-Medit. subreg.	NE
·	Cymbalaria aequitriloba (Viv.) A.Chev. subsp. aequitriloba	Plantaginaceae	Ch	SA-CO-AT-BL	EMOI	W-Medit. subreg.	NE
·	Cymbalaria mulleri (Moris) A.Chev. subsp. muelleri	Plantaginaceae	Ch	SA	ESA	Sa subprov.	NE
·	Cymbalaria mulleri (Moris) A.Chev. subsp. villosa Carnicero	Plantaginaceae	Ch	SA	ESA	Sa subprov.	NE
·	Cynanchica deficiens (Viv.) P.Caputo & Del Guacchio	Rubiaceae	H	SA	ESA	Sa subprov.	NT	3
·	Cynanchica pumila (Moris) P.Caputo & Del Guacchio	Rubiaceae	Ch	SA	ESA	Sa subprov.	LC	3
·	Cynoglossum barbaricinum Arrigoni & Selvi	Boraginaceae	H	SA	ESA	Sa subprov.	NT	3
·	Daucus rouyi Spalik & Reduron	Apiaceae	H	SA-CO-TN-AG	ETI-NA	W-Medit. subreg.	NE
·	Delphinium longipes Moris	Ranunculaceae	T	SA	ESA	Sa subprov.	VU	3
·	Dianthus cyatophorus Moris subsp. cyatophorus	Caryophyllaceae	Ch	SA	ESA	Sa subprov.	EN	3
·	Dianthus genargenteus Bacch., Brullo, Casti & Giusso	Caryophyllaceae	Ch	SA	ESA	Sa subprov.	NT	3
·	Dianthus ichnusae Bacch., Brullo, Casti & Giusso subsp. ichnusae	Caryophyllaceae	Ch	SA	ESA	Sa subprov.	NT	3
·	Dianthus ichnusae Bacch., Brullo, Casti & Giusso subsp. toddei Bacch., Brullo, Casti & Giusso	Caryophyllaceae	Ch	SA	ESA	Sa subprov.	VU	3
·	Dianthus insularis Bacch., Brullo, Casti & Giusso	Caryophyllaceae	Ch	SA	ESA	Sa subprov.	EN	3
·	Dianthus morisianus Vals.	Caryophyllaceae	Ch	SA	ESA	Sa subprov.	CR	3
·	Dianthus mossanus Bacch. & Brullo	Caryophyllaceae	Ch	SA	ESA	Sa subprov.	NT	3
·	Dianthus oliastrae Bacch., Brullo, Casti & Giusso	Caryophyllaceae	Ch	SA	ESA	Sa subprov.	LC	3
·	Dianthus sardous Bacch., Brullo, Casti & Giusso	Caryophyllaceae	Ch	SA	ESA	Sa subprov.	LC	3
*	Dipsacus ferox Loisel.	Caprifoliaceae	H	SA-CO	ESC	Sa-Co prov.	NE
*	Dipsacus valsecchiae Camarda	Caprifoliaceae	H	SA	ESA	Sa subprov.	LC	3
·	Drymocallis corsica (Soleirol ex Lehm.) Kurtto	Rosaceae	H	SA-CO	ESC	Sa-Co prov.	NE
·	Echium anchusoides Bacch., Brullo & Selvi	Boraginaceae	H	SA	ESA	Sa subprov.	LC	3
·	Erodium corsicum Léman	Geraniaceae	Ch	SA-CO	ESC	Sa-Co prov.	NE
·	Euphorbia gayi Salis	Euphorbiaceae	G	SA-CO	ESC	Sa-Co prov.	NE
·	Euphorbia meuselii Geltman	Euphorbiaceae	Ch	SA-CO-SI-ITM	ET	Ital.-Tyrr. superprov.	DD	3
·	Euphorbia pithyusa L. subsp. cupanii (Guss. ex Bertol.) Radcl.-Sm.	Euphorbiaceae	Ch	SA-CO-SI	ETI	Ital.-Tyrr. superprov.	NE
·	Euphorbia semiperfoliata Viv.	Euphorbiaceae	Ch	SA-CO	ESC	Sa-Co prov.	NE
·	Euphrasia nana (Rouy) Prain	Orobanchaceae	T	SA-CO	ESC	Sa-Co prov.	LC	1.13
·	Ferula arrigonii Bocchieri	Apiaceae	H	SA-CO	ESC	Sa-Co prov.	LC	3
·	Festuca morisiana Parl. subsp. morisiana	Poaceae	H	SA	ESA	Sa subprov.	VU	3
·	Festuca sardoa (Hack.) K.Richt.	Poaceae	H	SA-CO	ESC	Sa-Co prov.	LC	14
·	Filago tyrrhenica Chrtek & Holub	Asteraceae	T	SA-CO	ESC	Sa-Co prov.	NE
·	Galium corsicum Spreng.	Rubiaceae	H	SA-CO	ESC	Sa-Co prov.	NE
·	Galium glaucophyllum Em.Schmid	Rubiaceae	H	SA	ESA	Sa subprov.	LC	3
·	Galium schmidii Arrigoni	Rubiaceae	Ch	SA	ESA	Sa subprov.	LC	3
·	Galium verrucosum Huds. subsp. halophilum (Ponzo) Lambinon	Rubiaceae	T	SA-CO-AT-SI	ETI	Ital.-Tyrr. superprov.	NE
·	Gelasia callosa (Moris) Zaika, Sukhor. & N.Kilian	Asteraceae	H	SA	ESA	Sa subprov.	NT	3
·	Genista arbusensis Vals.	Fabaceae	NP	SA	ESA	Sa subprov.	LC	3
·	Genista bocchierii Bacch., Brullo & Feoli Chiapella	Fabaceae	P	SA	ESA	Sa subprov.	CR	3
·	Genista cadasonensis Vals.	Fabaceae	NP	SA	ESA	Sa subprov.	NT	3
·	Genista corsica (Loisel.) DC.	Fabaceae	NP	SA-CO	ESC	Sa-Co prov.	LC	1.15
·	Genista desoleana Vals. subsp. martellii Bacch., Brullo & Giusso	Fabaceae	NP	SA	ESA	Sa subprov.	NE
·	Genista ephedroides DC.	Fabaceae	NP	SA	ESA	Sa subprov.	LC	3
·	Genista etnensis (Raf.) DC.	Fabaceae	P	SA-CO-SI	ETI	Ital.-Tyrr. superprov.	LC	3
·	Genista insularis Bacch., Brullo & Feoli Chiapella subsp. fodinae Bacch., Brullo & Feoli Chiapella	Fabaceae	NP	SA	ESA	Sa subprov.	LC	3
·	Genista insularis Bacch., Brullo & Feoli Chiapella subsp. insularis	Fabaceae	NP	SA	ESA	Sa subprov.	NT	3
·	Genista morisii Colla	Fabaceae	NP	SA	ESA	Sa subprov.	NT	3
·	Genista nuragica Bacch., Brullo & Giusso	Fabaceae	NP	SA	ESA	Sa subprov.	NT	16
·	Genista ovina Bacch., Brullo & Feoli Chiapella	Fabaceae	NP	SA	ESA	Sa subprov.	NT	3
·	Genista pichisermolliana Vals.	Fabaceae	NP	SA	ESA	Sa subprov.	LC	3
·	Genista salzmannii DC. subsp. limbarae Bacch., Brullo & Giusso	Fabaceae	NP	SA	ESA	Sa subprov.	LC	1.17
·	Genista sardoa Vals.	Fabaceae	NP	SA	ESA	Sa subprov.	EN	3
·	Genista sulcitana Vals.	Fabaceae	NP	SA	ESA	Sa subprov.	LC	3
·	Genista toluensis Vals.	Fabaceae	NP	SA	ESA	Sa subprov.	CR	3
·	Genista valsecchiae Brullo & De Marco	Fabaceae	NP	SA	ESA	Sa subprov.	LC	3
·	Glechoma sardoa (Bég.) Bég.	Lamiaceae	H	SA	ESA	Sa subprov.	LC	3
·	Helianthemum morisianum Bertol.	Cistaceae	Ch	SA	ESA	Sa subprov.	EN	3
·	Helianthemum oelandicum (L.) Dum.Cours. subsp. allionii (Tineo) Greuter & Burdet	Cistaceae	Ch	SA-SI	ESS	Ital.-Tyrr. superprov.	NT	3
·	Helichrysum italicum (Roth) G.Don subsp. pseudolitoreum (Fiori) Bacch., Brullo & Mossa	Asteraceae	Ch	SA-ITC (Toscana)	ET	Ital.-Tyrr. superprov.	NT	3
·	Helichrysum microphyllum (Willd.) Cambess. subsp. tyrrhenicum Bacch., Brullo & Giusso	Asteraceae	Ch	SA-CO	ESC	Sa-Co prov.	NE
·	Helichrysum saxatile Moris subsp. morisianum Bacch., Brullo & Mossa	Asteraceae	Ch	SA	ESA	Sa subprov.	LC	3
·	Helichrysum saxatile Moris subsp. saxatile	Asteraceae	Ch	SA	ESA	Sa subprov.	LC	3
·	Helicodiceros muscivorus (L.f.) Engl.	Araceae	G	SA-CO-BL	EMOI	W-Medit. subreg.	LC	18
·	Helleborus lividus Aiton subsp. corsicus (Briq.) P.Fourn.	Ranunculaceae	G	SA-CO	ESC	Sa-Co prov.	NE
·	Herniaria litardierei (Gamisans) Greuter & Burdet	Caryophyllaceae	H	SA-CO	ESC	Sa-Co prov.	NE
*	Hieracium bernardii Rouy subsp. gallurense (Arrigoni) Greuter	Asteraceae	H	SA	ESA	Sa subprov.	NE
*	Hieracium hypochoeroides S.Gibson subsp. supramontanum (Arrigoni) Greuter	Asteraceae	H	SA	ESA	Sa subprov.	NE
*	Hieracium leiopogon Gren. ex Verl. subsp. iolai (Arrigoni) Greuter	Asteraceae	H	SA	ESA	Sa subprov.	NE
*	Hieracium mattiroloanum Arv.-Touv. & Belli subsp. martellianum (Zahn) Greuter	Asteraceae	H	SA	ESA	Sa subprov.	NE
*	Hieracium pictum Pers. subsp. irginianum (Arrigoni) Greuter	Asteraceae	H	SA	ESA	Sa subprov.	NE
*	Hieracium racemosum Waldst. & Kit. ex Willd. subsp. limbarae (Arrigoni) Greuter	Asteraceae	H	SA	ESA	Sa subprov.	NE
*	Hieracium racemosum Waldst. & Kit. ex Willd. subsp. oliastrae (Arrigoni) Greuter	Asteraceae	H	SA	ESA	Sa subprov.	NE
*	Hyoseris taurina (Pamp.) Martinoli	Asteraceae	H	SA-SI-TN	ETI-NA	W-Medit. subreg.	NE
*	Hypericum annulatum Moris	Hypericaceae	H	SA	ESA	Sa subprov.	NE
*	Hypericum corsicum Steud.	Hypericaceae	H	SA-CO	ESC	Sa-Co prov.	NE
·	Hypericum hircinum L. subsp. hircinum	Hypericaceae	NP	SA-CO-AT	ETI	Ital.-Tyrr. superprov.	NE
·	Hypericum scruglii Bacch., Brullo & Salmeri	Hypericaceae	Ch	SA	ESA	Sa subprov.	EN	3
·	Hypochaeris sardoa Bacch., Brullo & Terrasi	Asteraceae	H	SA-(CO)	ESA	Sa subprov.	NE
·	Iberis integerrima Moris	Brassicaceae	Ch	SA	ESA	Sa subprov.	NT	3
*	Isoëtes tiguliana Gennari	Isoetaceae	G	SA-(NA)	ESA	Sa subprov.	NE
·	Lactuca longidentata Moris	Asteraceae	H	SA	ESA	Sa subprov.	EN	3
·	Lamium garganicum L. subsp. corsicum (Godr. & Gren.) Arcang.	Lamiaceae	H	SA-CO	ESC	Sa-Co prov.	NE
·	Lamyropsis microcephala (Moris) Dittrich & Greuter	Asteraceae	G	SA	ESA	Sa subprov.	CR	3
*	Limonium acutifolium (Rchb.) Salmon subsp. acutifolium	Plumbaginaceae	Ch	SA	ESA	Sa subprov.	LC	3
*	Limonium acutifolium (Rchb.) Salmon subsp. bosanum (Arrigoni & Diana) Arrigoni	Plumbaginaceae	Ch	SA	ESA	Sa subprov.	LC	3
*	Limonium acutifolium (Rchb.) Salmon subsp. cornusianum (Arrigoni & Diana) Arrigoni	Plumbaginaceae	Ch	SA	ESA	Sa subprov.	LC	3
*	Limonium acutifolium (Rchb.) Salmon subsp. nymphaeum (Erben) Arrigoni	Plumbaginaceae	Ch	SA	ESA	Sa subprov.	LC	3
*	Limonium acutifolium (Rchb.) Salmon subsp. tharrosianum (Arrigoni & Diana) Arrigoni	Plumbaginaceae	Ch	SA	ESA	Sa subprov.	VU	3
*	Limonium acutifolium (Rchb.) Salmon subsp. tenuifolium (Bertol. ex Moris) Arrigoni	Plumbaginaceae	Ch	SA	ESA	Sa subprov.	LC	3
·	Limonium ampuriense Arrigoni & Diana	Plumbaginaceae	Ch	SA	ESA	Sa subprov.	LC	3
·	Limonium capitis-eliae Erben	Plumbaginaceae	Ch	SA	ESA	Sa subprov.	CR	3
·	Limonium capitis-marci Arrigoni & Diana	Plumbaginaceae	Ch	SA	ESA	Sa subprov.	LC	3
·	Limonium carisae Erben	Plumbaginaceae	Ch	SA	ESA	Sa subprov.	VU	3
*	Limonium contortirameum (Mabille) Erben	Plumbaginaceae	Ch	SA-CO-(AT)	ESC	Sa-Co prov.	NE
·	Limonium coralliforme Alf.Mayer	Plumbaginaceae	Ch	SA	ESA	Sa subprov.	LC	3
·	Limonium cunicularium Arrigoni & Diana	Plumbaginaceae	Ch	SA	ESA	Sa subprov.	LC	3
·	Limonium dubium (Andrews ex Guss.) Litard.	Plumbaginaceae	Ch	SA-CO-SI	ETI	Ital.-Tyrr. superprov.	NE
·	Limonium gallurense Arrigoni & Diana	Plumbaginaceae	Ch	SA	ESA	Sa subprov.	LC	3
·	Limonium glomeratum (Tausch) Erben	Plumbaginaceae	H	SA-SI	ESS	Ital.-Tyrr. superprov.	LC	5
·	Limonium hermaeum (Pignatti) Pignatti	Plumbaginaceae	Ch	SA	ESA	Sa subprov.	LC	3
·	Limonium insulare (Bég. & Landi) Arrigoni & Diana	Plumbaginaceae	Ch	SA	ESA	Sa subprov.	EN	3
·	Limonium laetum (Nyman) Pignatti	Plumbaginaceae	Ch	SA	ESA	Sa subprov.	LC	3
·	Limonium lausianum Pignatti	Plumbaginaceae	Ch	SA	ESA	Sa subprov.	EN	3
·	Limonium malfatanicum Erben	Plumbaginaceae	Ch	SA	ESA	Sa subprov.	NT	3
·	Limonium merxmuelleri Erben subsp. merxmuelleri	Plumbaginaceae	Ch	SA	ESA	Sa subprov.	LC	3
·	Limonium merxmuelleri Erben subsp. oristanum (Alf.Mayer) Arrigoni	Plumbaginaceae	Ch	SA	ESA	Sa subprov.	LC	3
*	Limonium merxmuelleri Erben subsp. sulcitanum (Arrigoni) Arrigoni	Plumbaginaceae	Ch	SA	ESA	Sa subprov.	LC	3
*	Limonium merxmuelleri Erben subsp. tigulianum (Arrigoni & Diana) Arrigoni	Plumbaginaceae	Ch	SA	ESA	Sa subprov.	LC	3
·	Limonium morisianum Arrigoni	Plumbaginaceae	Ch	SA	ESA	Sa subprov.	VU	3
·	Limonium multifurcatum Erben	Plumbaginaceae	H	SA	ESA	Sa subprov.	LC	3
·	Limonium protohermaeum Arrigoni & Diana	Plumbaginaceae	Ch	SA	ESA	Sa subprov.	LC	3
·	Limonium pseudolaetum Arrigoni & Diana	Plumbaginaceae	Ch	SA	ESA	Sa subprov.	VU	3
·	Limonium pulviniforme Arrigoni & Diana	Plumbaginaceae	Ch	SA	ESA	Sa subprov.	DD	3
·	Limonium racemosum (Lojac.) Diana	Plumbaginaceae	Ch	SA	ESA	Sa subprov.	LC	3
*	Limonium retirameum Greuter & Burdet subsp. caralitanum Arrigoni	Plumbaginaceae	Ch	SA	ESA	Sa subprov.	LC	3
*	Limonium retirameum Greuter & Burdet subsp. retirameum	Plumbaginaceae	Ch	SA	ESA	Sa subprov.	LC	3
·	Limonium strictissimum (Salzm.) Arrigoni	Plumbaginaceae	Ch	SA-CO	ESC	Sa-Co prov.	EN	1.19
*	Limonium tibulatium Pignatti	Plumbaginaceae	Ch	SA	ESA	Sa subprov.	LC	3
·	Limonium tyrrhenicum Arrigoni & Diana	Plumbaginaceae	Ch	SA	ESA	Sa subprov.	LC	3
·	Limonium ursanum Erben	Plumbaginaceae	Ch	SA	ESA	Sa subprov.	NT	3
·	Limonium viniolae Arrigoni & Diana	Plumbaginaceae	Ch	SA	ESA	Sa subprov.	LC	3
·	Linaria arcusangeli Atzei & Camarda	Plantaginaceae	Ch	SA	ESA	Sa subprov.	EN	3
·	Linaria cossonii Barratte	Plantaginaceae	H	SA-TN	ETI-NA	W-Medit. subreg.	NE
·	Linaria flava (Poir.) Desf. subsp. sardoa (Sommier) A.Terracc.	Plantaginaceae	T	SA-CO	ESC	Sa-Co prov.	NT	20
·	Linum mulleri Moris	Linaceae	Ch	SA	ESA	Sa subprov.	EN	3
*	Lolium interruptum (Desf.) Banfi, Galasso, Foggi, Kopecký & Ardenghi subsp. corsicum (Hack.) Banfi, Galasso, Foggi, Kopecký & Ardenghi	Poaceae	H	SA-CO-AT	ETI	Ital.-Tyrr. superprov.	NE
*	Lonicera cyrenaica Viv.	Caprifoliaceae	NP	SA-LI	ETI-NA	W-Medit. subreg.	NE
·	Malva lusitanica (L.) Valdés subsp. pallescens (Moris) Valdés	Malvaceae	NP	SA	ESA	Sa subprov.	CR	3
·	Malva stenopetala (Coss. & Durieu ex Batt.) Soldano, Banfi & Galasso subsp. plazzae (Atzei) Iamonico, Bartolucci & Peruzzi	Malvaceae	NP	SA	ESA	Sa subprov.	CR	3
·	Mentha requienii Benth. subsp. requienii	Lamiaceae	H	SA-CO	ESC	Sa-Co prov.	NE
*	Mentha suaveolens Ehrh. subsp. insularis (Req.) Greuter	Lamiaceae	H	SA-CO-AT-SI-BL	EMOI	W-Medit. subreg.	LC	1.21
·	Mercurialis corsica Coss. & Kralik	Euphorbiaceae	Ch	SA-CO	ESC	Sa-Co prov.	NE
·	Micromeria cordata (Moris ex Bertol.) Moris	Lamiaceae	Ch	SA	ESA	Sa subprov.	LC	3
·	Micromeria filiformis (Aiton) Benth. subsp. filiformis	Lamiaceae	Ch	SA-BL-(CO)	EMOI	W-Medit. subreg.	NE
·	Morisia monanthos (Viv.) Asch.	Brassicaceae	H	SA-CO	ESC	Sa-Co prov.	NE
·	Myosotis soleirolii Godr.	Boraginaceae	H	SA-CO	ESC	Sa-Co prov.	LC	1.22
·	Nananthea perpusilla (Loisel.) DC.	Asteraceae	T	SA-CO	ESC	Sa-Co prov.	VU	1.23
·	Narcissus supramontanus Arrigoni subsp. cunicularium Arrigoni	Amaryllidaceae	G	SA	ESA	Sa subprov.	NT	3
·	Narcissus supramontanus Arrigoni subsp. supramontanus	Amaryllidaceae	G	SA	ESA	Sa subprov.	NT	3
·	Nepeta foliosa Moris	Lamiaceae	Ch	SA	ESA	Sa subprov.	VU	3
*	Noccaea brevistyla (DC.) Steud.	Brassicaceae	H	SA-CO-SI	ETI	Ital.-Tyrr. superprov.	NE
·	Odontarrhena tavolarae (Briq.) L.Cecchi & Selvi	Brassicaceae	Ch	SA	ESA	Sa subprov.	NT	3
·	Odontites corsicus (Loisel.) G.Don	Orobanchaceae	T	SA-CO	ESC	Sa-Co prov.	NE
·	Oenanthe lisae Moris	Apiaceae	H	SA-(CO)	ESA	Sa subprov.	LC	3
·	Ophrys exaltata Ten. subsp. morisii (Martelli) Del Prete	Orchidaceae	G	SA-CO	ESC	Sa-Co prov.	NE
*	Ophrys fusca Link subsp. ortuabis (M.P.Grasso & Manca) Kreutz	Orchidaceae	G	SA	ESA	Sa subprov.	NT	3
·	Ophrys holosericea (Burm.f.) Greuter subsp. annae (Devillers-Tersch. & Devillers) H.Baumann, Giotta, Künkele, R.Lorenz & Piccitto	Orchidaceae	G	SA-CO	ESC	Sa-Co prov.	NE
·	Ophrys holosericea (Burm.f.) Greuter subsp. chestermanii J.J.Wood	Orchidaceae	G	SA	ESA	Sa subprov.	LC	3
*	Ophrys normanii J.J.Wood	Orchidaceae	G	SA	ESA	Sa subprov.	EN	24
·	Ophrys panattensis Scrugli, Cogoni & Pessei	Orchidaceae	G	SA	ESA	Sa subprov.	NT	3
·	Ophrys scolopax Cav. subsp. conradiae (Melki & Deschâtres) H.Baumann, Giotta, Künkele, R.Lorenz & Piccitto	Orchidaceae	G	SA-CO	ESC	Sa-Co prov.	NE
·	Ophrys sphegodes Mill. subsp. praecox Corrias	Orchidaceae	G	SA-CO	ESC	Sa-Co prov.	NE
*	Ophrys subfusca (Rchb.F.) Hausskn. subsp. liveranii Orrù & M.P.Grasso	Orchidaceae	G	SA	ESA	Sa subprov.	NE
·	Orchis brancifortii Biv.	Orchidaceae	G	SA-SI	ESS	Ital.-Tyrr. superprov.	NE
·	Orchis mascula (L.) L. subsp. ichnusae Corrias	Orchidaceae	G	SA-CO	ESC	Sa-Co prov.	NE
·	Ornithogalum corsicum Jord. & Fourr.	Asparagaceae	G	SA-CO	ESC	Sa-Co prov.	LC	25
·	Orobanche australis Moris ex Bertol.	Orobanchaceae	G	SA	ESA	Sa subprov.	DD	3
·	Orobanche denudata Moris	Orobanchaceae	G	SA	ESA	Sa subprov.	NT	3
·	Orobanche rigens Loisel.	Orobanchaceae	G	SA-CO	ESC	Sa-Co prov.	NE
·	Paeonia corsica Sieber ex Tausch	Paeoniaceae	G	SA-CO	ESC	Sa-Co prov.	NE
·	Paeonia sandrae Camarda	Paeoniaceae	G	SA	ESA	Sa subprov.	LC	3
·	Pancratium illyricum L.	Amaryllidaceae	G	SA-CO-AT	ETI	Ital.-Tyrr. superprov.	LC	1.26
*	Pastinaca kochii Duby	Apiaceae	H	SA-CO	ESC	Sa-Co prov.	NE
*	Peucedanum paniculatum Loisel.	Apiaceae	H	SA-CO	ESC	Sa-Co prov.	NE
*	Phagnalon rupestre (L.) DC. subsp. morisianum (Ces., Pass. & Gibelli) Arcang.	Asteraceae	Ch	SA	ESA	Sa subprov.	LC	3
*	Phalaris arundinacea L. subsp. rotgesii (Husn.) Kerguélen	Poaceae	H	SA-CO	ESC	Sa-Co prov.	NE
·	Phleum sardoum (Hack.) Hack.	Poaceae	T	SA	ESA	Sa subprov.	CR	3
·	Pilosella kralikii (Rouy) J.-M.Tison	Asteraceae	H	SA-CO	ESC	Sa-Co prov.	NE
·	Pinguicula sehuensis Bacch., Cannas & Peruzzi	Lentibulariaceae	H	SA	ESA	Sa subprov.	VU	3
·	Plagius flosculosus (L.) Alavi & Heywood	Asteraceae	Ch	SA-CO	ESC	Ital.-Tyrr. superprov.	VU	1.27
*	Plantago sarda C.Presl	Plantaginaceae	Ch	SA-CO	ESC	Sa-Co prov.	NE
·	Poa balbisii Parl.	Poaceae	G	SA-CO	ESC	Sa-Co prov.	LC	28
*	Polygala padulae Arrigoni	Polygalaceae	H	SA	ESA	Sa subprov.	LC	3
·	Polygala sardoa Chodat	Polygalaceae	H	SA	ESA	Sa subprov.	EN	3
·	Polygala sinisica Arrigoni	Polygalaceae	H	SA	ESA	Sa subprov.	CR	3
·	Polygonum scoparium Req. ex Loisel.	Polygonaceae	Ch	SA-CO	ESC	Sa-Co prov.	NE
*	Portulaca sardoa Danin, Bagella & Marrosu	Portulacaceae	T	SA	ESA	Sa subprov.	LC	3
·	Potentilla crassinervia Viv.	Rosaceae	H	SA-CO	ESC	Sa-Co prov.	NE
·	Prospero corsicum (Boullu) J.-M.Tison	Asparagaceae	G	SA-CO	ESC	Sa-Co prov.	NE
·	Ptilostemon casabonae (L.) Greuter	Asteraceae	H	SA-CO-H-(AT)	EMOI	W-Medit. subreg.	NE
·	Ptychotis sardoa Pignatti & Metlesics	Apiaceae	H	SA-CO	ESC	Sa-Co prov.	EN	3
·	Quercus ichnusae Mossa, Bacch. & Brullo	Fagaceae	P	SA	ESA	Sa subprov.	LC	3
·	Ranunculus cordiger Viv. subsp. cordiger	Ranunculaceae	H	SA-CO	ESC	Sa-Co prov.	NE
*	Ranunculus cordiger Viv. subsp. diffusus (Moris) Arrigoni	Ranunculaceae	H	SA	ESA	Sa subprov.	NE
·	Ranunculus cymbalariifolius Balb. ex Moris	Ranunculaceae	H	SA	ESA	Sa subprov.	LC	3
·	Ranunculus pratensis C.Presl	Ranunculaceae	H	SA-SI	ESS	Ital.-Tyrr. superprov.	NE
·	Ranunculus revelierei Boreau	Ranunculaceae	T	SA-CO-GA	EMO	W-Medit. subreg.	NE
*	Reseda luteola L. subsp. dimerocarpa (Müll.Arg.) Abdallah & de Wit	Resedaceae	H	SA-(AT)	ESA	Sa subprov.	NE
·	Rhamnus persicifolia Moris	Rhamnaceae	P	SA	ESA	Sa subprov.	EN	3
·	Ribes multiflorum Kit. ex Roem. & Schult. subsp. sandalioticum Arrigoni	Grossulariaceae	NP	SA	ESA	Sa subprov.	EN	3
·	Ribes sardoum Martelli	Grossulariaceae	NP	SA	ESA	Sa subprov.	CR	3
·	Romulea bocchierii Frignani & Iiriti	Iridaceae	G	SA	ESA	Sa subprov.	NT	3
·	Romulea requienii Parl.	Iridaceae	G	SA-CO-(ITC)	ESC	Sa-Co prov.	LC	1.29
·	Romulea revelierei Jord. & Fourr.	Iridaceae	G	SA-CO-AT	ETI	Ital.-Tyrr. superprov.	NE
*	Rubus arrigonii Camarda	Rosaceae	NP	SA	ESA	Sa subprov.	DD	3
*	Rubus laconensis Camarda	Rosaceae	NP	SA	ESA	Sa subprov.	DD	3
*	Rubus limbarae Camarda	Rosaceae	NP	SA	ESA	Sa subprov.	DD	3
*	Rubus pignattii Camarda	Rosaceae	NP	SA	ESA	Sa subprov.	DD	3
·	Rumex pulcher L. subsp. suffocatus (Moris ex Bertol.) Nyman	Polygonaceae	H	SA	ESA	Sa subprov.	LC	3
·	Ruta lamarmorae Bacch., Brullo & Giusso	Rutaceae	Ch	SA	ESA	Sa subprov.	EN	3
·	Sabulina verna (L.) Rchb. subsp. grandiflora (C.Presl) Dillenb. & Kadereit	Caryophyllaceae	H	SA-SI	ESS	Ital.-Tyrr. superprov.	LC	3
·	Sagina pilifera (DC.) Fenzl.	Caryophyllaceae	H	SA-CO	ESC	Sa-Co prov.	NE
·	Salix arrigonii Brullo	Salicaceae	P	SA	ESA	Sa subprov.	VU	3
*	Salvia desoleana Atzei & V.Picci	Lamiaceae	Ch	SA	ESA	Sa subprov.	DD	3
·	Santolina corsica Jord. & Fourr.	Asteraceae	Ch	SA-CO	ESC	Sa-Co prov.	NE
·	Santolina insularis (Gennari ex Fiori) Arrigoni	Asteraceae	Ch	SA	ESA	Sa subprov.	LC	3
·	Saponaria ocymoides L. subsp. alsinoides (Viv.) Arcang.	Caryophyllaceae	Ch	SA-CO	ESC	Sa-Co prov.	NE
·	Saxifraga corsica (Ser. ex Duby) Gren. & Godr. subsp. corsica	Saxifragaceae	H	SA-CO	ESC	Sa-Co prov.	NE
·	Saxifraga pedemontana All. subsp. cervicornis (Viv.) Engl.	Saxifragaceae	Ch	SA-CO	ESC	Sa-Co prov.	NE
·	Scrophularia morisii Vals.	Scrophulariaceae	H	SA	ESA	Sa subprov.	DD	3
*	Scrophularia oblongifolia Loisel.	Scrophulariaceae	H	SA-CO	ESC	Sa-Co prov.	NE
·	Scrophularia trifoliata L.	Scrophulariaceae	H	SA-CO-AT	ETI	Ital.-Tyrr. superprov.	NE
*	Sedum glandulosum Moris	Crassulaceae	T	SA-AT-(AG)	ETI	Ital.-Tyrr. superprov.	NE
·	Senecio morisii J.Calvo & Bacch.	Asteraceae	H	SA	ESA	Sa subprov.	VU	3
·	Senecio squalidus L. subsp. sardous Greuter	Asteraceae	H	SA	ESA	Sa subprov.	NT	3
*	Senecio transiens (Rouy) Jeanm.	Asteraceae	T	SA-CO	ESC	Sa-Co prov.	NE
·	Serapias nurrica Corrias subsp. santuingensis (Senis, M.P.Grasso & Orrù) Senis, M.P.Grasso & Orrù	Orchidaceae	G	SA	ESA	Sa subprov.	CR	3
·	Serapias nurrica Corrias subsp. nurrica	Orchidaceae	G	SA-CO-SI-BL-ITM-(TN-GA)	EMO	W-Medit. subreg.	NE
·	Seseli praecox (Gamisans) Gamisans	Apiaceae	Ch	SA-CO	ESC	Sa-Co prov.	NE
·	Seseli tortuosum L. subsp. maritimum (Guss.) C.Brullo, Brullo, Giusso & Sciandr.	Apiaceae	Ch	SA-SI-ITM (Calabria)	ET	Ital.-Tyrr. superprov.	EN	3
·	Sesleria insularis Sommier subsp. barbaricina Arrigoni	Poaceae	H	SA	ESA	Sa subprov.	EN	3
·	Sesleria insularis Sommier subsp. insularis	Poaceae	H	SA-CO-BL	EMOI	W-Medit. subreg.	NE
·	Sesleria insularis Sommier subsp. morisiana Arrigoni	Poaceae	H	SA	ESA	Sa subprov.	VU	3
·	Silene beguinotii Vals.	Caryophyllaceae	T	SA	ESA	Sa subprov.	LC	3
·	Silene ichnusae Brullo, De Marco & De Marco f.	Caryophyllaceae	Ch	SA	ESA	Sa subprov.	NT	3
·	Silene martinolii Bocchieri & Mulas	Caryophyllaceae	T	SA	ESA	Sa subprov.	NT	3
·	Silene morisiana Bég. & Ravano	Caryophyllaceae	T	SA	ESA	Sa subprov.	EN	3
·	Silene nodulosa Viv.	Caryophyllaceae	H	SA-CO	ESC	Sa-Co prov.	NE
·	Silene rosulata Soy-Will. & Godr. subsp. sanctae-therasiae (Jeanm.) Jeanm.	Caryophyllaceae	H	SA	ESA	Sa subprov.	EN	3
·	Silene succulenta Forssk. subsp. corsica (DC.) Nyman	Caryophyllaceae	H	SA-CO	ESC	Sa-Co prov.	NE
·	Silene valsecchiae Bocchieri	Caryophyllaceae	T	SA	ESA	Sa subprov.	EN	3
·	Silene velutina Pourr. ex Loisel.	Caryophyllaceae	Ch	SA-CO	ESC	Sa-Co prov.	NT	1,30
·	Siler montanum Crantz subsp. corrasianum Bacch., Congiu, F.Conti & Bartolucci	Apiaceae	H	SA	ESA	Sa subprov.	NE
·	Siler montanum Crantz subsp. ogliastrinum Bacch., F.Conti & Bartolucci	Apiaceae	H	SA	ESA	Sa subprov.	NE
·	Soleirolia soleirolii (Req.) Dandy	Urticaceae	H	SA-CO-AT-BL-AG	ETI-NA	W-Medit. subreg.	NE
·	Solenopsis corsica (Meikle) M.B.Crespo, Serra & Juan	Campanulaceae	H	SA-CO	ESC	Sa-Co prov.	NE
·	Sorbus aucuparia L. subsp. praemorsa (Guss.) Nyman	Rosaceae	P	SA-CO-SI-ITM (Calabria)	ET	Ital.-Tyrr. superprov.	NE
·	Spergularia macrorhiza (Req. ex Loisel.) Heynh.	Caryophyllaceae	Ch	SA-CO-(ITM)	ESC	Sa-Co prov.	NE
·	Stachys corsica Pers.	Lamiaceae	H	SA-CO	ESC	Sa-Co prov.	NE
·	Stachys glutinosa L.	Lamiaceae	Ch	SA-CO-AT	ETI	Ital.-Tyrr. superprov.	NE
·	Stachys salisii Jord. & Fourr.	Lamiaceae	T	SA-CO-AT	ETI	Ital.-Tyrr. superprov.	NE
·	Staphisagria requienii (DC.) Spach subsp. picta (Willd.) Peruzzi	Ranunculaceae	H	SA-CO-BL-H	EMOI	W-Medit. subreg.	NE
·	Tanacetum audibertii (Req.) DC.	Asteraceae	G	SA-CO	ESC	Sa-Co prov.	NE
*	Taraxacum barbaricinum Arrigoni	Asteraceae	H	SA	ESA	Sa subprov.	DD	3
*	Taraxacum caramanicae Lojac.	Asteraceae	H	SA-SI	ESS	Ital.-Tyrr. superprov.	LC	3
*	Taraxacum garbarianum Peruzzi, Aquaro, Caparelli & Raimondo	Asteraceae	H	SA-SI	ESS	Ital.-Tyrr. superprov.	LC	3
*	Taraxacum genargenteum Arrigoni	Asteraceae	H	SA	ESA	Sa subprov.	DD	3
*	Taraxacum sarcidanum Arrigoni	Asteraceae	H	SA	ESA	Sa subprov.	DD	3
*	Taraxacum sardomontanum Arrigoni	Asteraceae	H	SA	ESA	Sa subprov.	DD	3
·	Teucrium marum L.	Lamiaceae	Ch	SA-CO-AT-BL-H	EMOI	W-Medit. subreg.	NE
*	Teucrium subspinosum Pourr. ex Willd.	Lamiaceae	Ch	SA-BL	EMOI	W-Medit. subreg.	NE
·	Thesium italicum A.DC.	Santalaceae	H	SA	ESA	Sa subprov.	LC	3
·	Thinopyrum corsicum (Hack.) Banfi	Poaceae	H	SA-CO	ESC	Sa-Co prov.	NE
·	Thymus herba-barona Loisel.	Lamiaceae	Ch	SA-CO-BL	EMOI	W-Medit. subreg.	NE
·	Torilis nemoralis (Brullo) Brullo & Giusso	Apiaceae	T	SA-SI-(BL)	ESS	Ital.-Tyrr. superprov.	NE
·	Trisetaria burnoufii (Req. ex Parl.) Banfi & Soldano	Poaceae	H	SA-CO-AT	ETI	Ital.-Tyrr. superprov.	NE
·	Trisetaria gracilis (Moris) Banfi & Arrigoni	Poaceae	H	SA-CO	ESC	Sa-Co prov.	NT	1.31
·	Urtica atrovirens Req. ex Loisel.	Urticaceae	H	SA-CO-AT-ITC (Toscana)	ET	Ital.-Tyrr. superprov.	NE
·	Verbascum conocarpum Moris subsp. conocarpum	Scrophulariaceae	H	SA-CO-AT	ETI	Ital.-Tyrr. superprov.	NE
·	Verbascum plantagineum Moris	Scrophulariaceae	H	SA	ESA	Sa subprov.	VU	3
·	Veronica verna L. subsp. brevistyla (Moris) Rouy	Plantaginaceae	T	SA-CO	ESC	Sa-Co prov.	NE
·	Vinca difformis Pourr. subsp. sardoa Stearn	Apocynaceae	Ch	SA	ESA	Sa subprov.	LC	3
·	Viola corsica Nyman subsp. limbarae Merxm. & W.Lippert	Violaceae	H	SA	ESA	Sa subprov.	NT	3
·	Ziziphora sardoa (Asch. & Levier) Bartolucci, Galasso & Bräuchler	Lamiaceae	Ch	SA	ESA	Sa subprov.	LC	3

## Sheet: Taxa excludenda
Table S2. List of taxa excludenda with the following information: 1, Dominant biological form; 2, Distribution (invalidated); 3, Chorological category (invalidated), 4 Biogegraphical unit (invalidated). See the main manuscript for Distribution and Chorological categories details.
Taxon	Family	1	2	3	4
Bupleurum falcatum L. subsp. corsicum (Coss. & Kralik) Rouy & E.G.Camus	Apiaceae	Ch	(SA)-CO	ESC	Sa-Co prov.
Calendula suffruticosa Vahl subsp. maritima (Guss.) Meikle	Asteraceae	Ch	SA-SI	ESS	Ital.-Tyrr. superprov.
Castroviejoa frigida (Labill.) Galbany, L.Sáez & Benedí	Asteraceae	Ch	CO	ESC	Co subprov.
Colchicum arenasii Fridl.	Colchicaceae	G	SA-CO	ESC	Sa-Co prov.
Crocus corsicus Vanucchi ex Maw	Iridaceae	G	(SA)-CO	ESC	Co subprov.
Festuca alfrediana Foggi & Signorini subsp. alfrediana	Poaceae	H	SA-CO	ESC	Sa-Co prov.
Hieracium bernardii Rouy subsp. templare (Arrigoni) Greuter	Asteraceae	H	SA	ESA	Sa subprov.
Hornungia procumbens (L.) Hayek subsp. revelierei (Jord.) Giardina & Raimondo	Brassicaceae	T	SA-CO-SI-ME	ETI	Ital.-Tyrr. superprov.
Limonium dolcheri Pignatti	Plumbaginaceae	Ch	SA	ESA	Sa subprov.
Lotus cytisoides L. subsp. conradiae Gamisans	Fabaceae	T	SA-CO	ESC	Sa-Co prov.
Malva alcea L. subsp. ribifolia (Viv.) Kerguélen	Malvaceae	H	SA-CO	ESC	Sa-Co prov.
Ophrys panormitana (Tod.) Soó	Orchidaceae	G	SA-SI	ESS	Ital.-Tyrr. superprov.
Sagina revelierei Jord. & Fourr.	Caryophyllaceae	H	SA-CO	ESC	Sa-Co prov.
Salix purpurea L. subsp. eburnea (Borzì) Cif. & Giacom. ex Pignatti	Salicaceae	P	SA	ESA	Sa subprov.
Silene requienii Otth	Caryophyllaceae	Ch	(SA)-CO	ESC	Co subprov.
Hypochaeris linearifolia Moris	Asteraceae	H	SA	ESA	Sa subprov.

## Sheet: Sources
1	IUCN. 2021. The IUCN Red List of Threatened Species. Version 2021-3. https://www.iucnredlist.org. Accessed on [20/12/2021].
2	Lansdown, R.V. 2018. Acis rosea. The IUCN Red List of Threatened Species 2018: e.T13142681A18614065. https://dx.doi.org/10.2305/IUCN.UK.2018-1.RLTS.T13142681A18614065.en. Downloaded on 01 December 2021.
3	Orsenigo, S., Montagnani, C., Fenu, G., Gargano, D., Peruzzi, L., Abeli, T., ... & Rossi, G. 2018. Red Listing plants under full national responsibility: Extinction risk and threats in the vascular flora endemic to Italy. Biological Conservation, 224, 213-222.
4	Hugot, L., Juillet, N., & Bacchetta, G. 2011. "Anchusa crispa". The IUCN Red List of Threatened Species. IUCN. 2011: e.T61654A12533631. https://dx.doi.org/10.2305/IUCN.UK.2011-1.RLTS.T61654A12533631.en
5	Orsenigo, S., Fenu, G., Gargano, D., Montagnani, C., Abeli, T., Alessandrini, A., ... & Rossi, G. 2021. Red list of threatened vascular plants in Italy. Plant Biosystems, 155(2), 310-335.
6	García Murillo, P.G. 2018. Arum pictum. The IUCN Red List of Threatened Species 2018: e.T13133527A18611080. https://dx.doi.org/10.2305/IUCN.UK.2018-1.RLTS.T13133527A18611080.en. Downloaded on 02 December 2021.
7	Dulloo, M.E., Branca, F. & Donnini, D. 2011. Brassica insularis. The IUCN Red List of Threatened Species 2011: e.T162147A5548934. Downloaded on 02 December 2021.
8	Daoud-Bouattour, A., Ben Saad, S., Ghrabi-Gammar, Z. & Muller, S. 2018. Carex microcarpa. The IUCN Red List of Threatened Species 2018: e.T164246A87834226. https://dx.doi.org/10.2305/IUCN.UK.2018-1.RLTS.T164246A87834226.en. Downloaded on 02 December 2021.
9	Domina, G. 2011. Carex panormitana. The IUCN Red List of Threatened Species 2011: e.T188659A8649818. https://dx.doi.org/10.2305/IUCN.UK.2011-1.RLTS.T188659A8649818.en. Downloaded on 02 December 2021.
10	Fenu, G., Bacchetta, G., Bernardo, L., Calvia, G., Citterio, S., Foggi, B., ... & Orsenigo, S. 2016. Global and regional IUCN Red List assessments: 2. Italian Botanist, 2, 93.
11	Juillet, N. 2011. Colchicum corsicum. The IUCN Red List of Threatened Species 2011: e.T161885A5508819. https://dx.doi.org/10.2305/IUCN.UK.2011-1.RLTS.T161885A5508819.en. Downloaded on 02 December 2021.
12	Lansdown, R.V. 2018. Colchicum nanum. The IUCN Red List of Threatened Species 2018: e.T13134113A18610754. https://dx.doi.org/10.2305/IUCN.UK.2018-1.RLTS.T13134113A18610754.en. Downloaded on 02 December 2021.
13	Gigot, G. & Juillet, N. 2011. Euphrasia genargentea. The IUCN Red List of Threatened Species 2011: e.T162203A5557837. https://dx.doi.org/10.2305/IUCN.UK.2011-1.RLTS.T162203A5557837.en. Downloaded on 02 December 2021.
14	Nery, L. 2018. Festuca sardoa. The IUCN Red List of Threatened Species 2018: e.T13165494A18609260. https://dx.doi.org/10.2305/IUCN.UK.2018-1.RLTS.T13165494A18609260.en. Downloaded on 02 December 2021.
15	Rivers, M.C. 2017. Genista corsica. The IUCN Red List of Threatened Species 2017: e.T83756047A86136086. https://dx.doi.org/10.2305/IUCN.UK.2017-3.RLTS.T83756047A86136086.en. Downloaded on 02 December 2021.
16	Fenu, G., Abeli, T., Bacchetta, G., Cogoni, D., D’Agostino, M., Pinna, M. S., & Orsenigo, S. 2021. Global and regional IUCN red list assessments: 12. Italian Botanist, 12, 77.
17	Rivers, M.C. 2017. Genista salzmannii. The IUCN Red List of Threatened Species 2017: e.T83759451A86136181. https://dx.doi.org/10.2305/IUCN.UK.2017-3.RLTS.T83759451A86136181.en. Downloaded on 02 December 2021.
18	García Murillo, P.G. 2018. Helicodiceros muscivorus. The IUCN Red List of Threatened Species 2018: e.T13133565A18612545. https://dx.doi.org/10.2305/IUCN.UK.2018-1.RLTS.T13133565A18612545.en. Downloaded on 02 December 2021.
19	Arrigoni, P.V. & Juillet, N. 2011. Limonium strictissimum. The IUCN Red List of Threatened Species 2011: e.T61667A12535071. https://dx.doi.org/10.2305/IUCN.UK.2011-1.RLTS.T61667A12535071.en. Downloaded on 02 December 2021.
20	Buord, S. & Gargano, D. 2011. Linaria flava. The IUCN Red List of Threatened Species 2011: e.T162373A5581167. Downloaded on 02 December 2021.
21	Hugot, L. 2010. Mentha insularis. The IUCN Red List of Threatened Species 2010: e.T164111A5722381. https://dx.doi.org/10.2305/IUCN.UK.2010-2.RLTS.T164111A5722381.en. Downloaded on 02 December 2021.
22	Hugot, L. 2010. Myosotis soleirolii. The IUCN Red List of Threatened Species 2010: e.T164074A5695276. https://dx.doi.org/10.2305/IUCN.UK.2010-2.RLTS.T164074A5695276.en. Downloaded on 02 December 2021.
23	Hugot, L. 2010. Nananthea perpusilla. The IUCN Red List of Threatened Species 2010: e.T164477A5884389. https://dx.doi.org/10.2305/IUCN.UK.2010-2.RLTS.T164477A5884389.en. Downloaded on 02 December 2021.
24	Fenu, G., Bernardo, L., Calvo, R., Cortis, P., De Agostini, A., Gangale, C., ... & Orsenigo, S. 2019. Global and Regional IUCN Red List Assessments: 8. Italian Botanist, 8, 17.
25	Lansdown, R.V. 2018. Ornithogalum corsicum. The IUCN Red List of Threatened Species 2018: e.T13153044A18611870. https://dx.doi.org/10.2305/IUCN.UK.2018-1.RLTS.T13153044A18611870.en. Downloaded on 02 December 2021.
26	Lansdown, R.V. 2018. Pancratium illyricum. The IUCN Red List of Threatened Species 2018: e.T13147134A18609310. https://dx.doi.org/10.2305/IUCN.UK.2018-1.RLTS.T13147134A18609310.en. Downloaded on 02 December 2021.
27	Hugot, L., Bagella, S. & Ali, M.M. 2010. Plagius flosculosus. The IUCN Red List of Threatened Species 2010: e.T164028A5708564. https://dx.doi.org/10.2305/IUCN.UK.2010-2.RLTS.T164028A5708564.en. Downloaded on 02 December 2021.
28	Delage, A. & Nery, L. 2018. Poa balbisii. The IUCN Red List of Threatened Species 2018: e.T18009877A18613026. https://dx.doi.org/10.2305/IUCN.UK.2018-1.RLTS.T18009877A18613026.en. Downloaded on 02 December 2021.
29	Lansdown, R.V. 2018. Romulea requienii. The IUCN Red List of Threatened Species 2018: e.T13164096A18613046. https://dx.doi.org/10.2305/IUCN.UK.2018-1.RLTS.T13164096A18613046.en. Downloaded on 02 December 2021.
30	Buord, S., Gargano, D., Gigot, G. & Montagnani, C. 2011. Silene velutina. The IUCN Red List of Threatened Species 2011: e.T161830A5501371. https://dx.doi.org/10.2305/IUCN.UK.2011-1.RLTS.T161830A5501371.en. Downloaded on 02 December 2021.
31	Peraza Zurita, M.D. 2018. Trisetum gracile. The IUCN Red List of Threatened Species 2018: e.T13168434A18611175. https://dx.doi.org/10.2305/IUCN.UK.2018-1.RLTS.T13168434A18611175.en. Downloaded on 02 December 2021.
